# Supplementary material for: Kinetic and equilibrium studies of anilinoalkanesulfonate formation
Source: Royal Society of Chemistry journal article supplement (doi:10.1039/b803070g), 2008-01-01
Supplement: b803070g.pdf [file b803070g.pdf]

Table S1

Kinetic and equilibrium data for reaction of **1a** with aniline<sup>a</sup> in water at 25°C and pH = 7.6.

| [ <b>1a</b> ]/<br>10 <sup>-3</sup> mol dm <sup>-3</sup> | [sulfite]/<br>10 <sup>-3</sup> mol dm <sup>-3</sup> | k <sub>obs</sub> <sup>b</sup> /<br>10 <sup>-3</sup> s <sup>-1</sup> | k <sub>obs</sub> [sulfite]/<br>10 <sup>-6</sup> mol dm <sup>-3</sup> s <sup>-1</sup> | ΔAbs <sup>c</sup> | K <sup>d</sup> /<br>dm <sup>3</sup> mol <sup>-1</sup> |
|---------------------------------------------------------|-----------------------------------------------------|---------------------------------------------------------------------|--------------------------------------------------------------------------------------|-------------------|-------------------------------------------------------|
| 3.9                                                     | 2.2                                                 | 1.48                                                                | 3.18                                                                                 | 0.286             | 76                                                    |
| 6.3                                                     | 2.7                                                 | 1.22                                                                | 3.27                                                                                 | 0.412             | 78                                                    |
| 8.0                                                     | 3.0                                                 | 1.12                                                                | 3.42                                                                                 | 0.481             | 78                                                    |
| 17                                                      | 4.4                                                 | 1.09                                                                | 4.89                                                                                 | 0.709             | 77                                                    |
| 26                                                      | 5.4                                                 | 1.12                                                                | 6.06                                                                                 | 0.811             | 71                                                    |
| 44                                                      | 6.5                                                 | 1.30                                                                | 8.41                                                                                 | 0.933             | 68                                                    |

a. Concentration is 1 × 10<sup>-4</sup> mol dm<sup>-3</sup>.

b. Measured at 250 nm.

c. Change in absorbance accompanying reaction.

d. Calculated as ΔAbs/(ΔAbs<sub>∞</sub> - ΔAbs)·[**1a**] with ΔAbs<sub>∞</sub> 1.25. A linear plot of k<sub>obs</sub>[sulfite] versus [**1a**] gives k<sub>f</sub>[sulfite] 1.4 × 10<sup>-4</sup> s<sup>-1</sup> and k<sub>r</sub>[sulfite] 2.2 × 10<sup>-6</sup> mol dm<sup>-3</sup> s<sup>-1</sup> leading to K (= k<sub>f</sub>/k<sub>r</sub>) 64 dm<sup>3</sup> mol<sup>-1</sup>.

Table S2

Kinetic and equilibrium data for reaction of **1a** with 4-chloroaniline<sup>a</sup> in water at 25°C and pH 8.0.

| [ <b>1a</b> ]/<br>10 <sup>-3</sup> mol dm <sup>-3</sup> | [sulfite]/<br>10 <sup>-3</sup> mol dm <sup>-3</sup> | k <sub>obs</sub> <sup>b</sup> /<br>10 <sup>-4</sup> s <sup>-1</sup> | k <sub>obs</sub> [sulfite]/<br>10 <sup>-6</sup> mol dm <sup>-3</sup> | ΔAbs <sup>c</sup> | K <sup>d</sup> /<br>dm <sup>3</sup> mol <sup>-1</sup> |
|---------------------------------------------------------|-----------------------------------------------------|---------------------------------------------------------------------|----------------------------------------------------------------------|-------------------|-------------------------------------------------------|
| 8.0                                                     | 3.0                                                 | 7.30                                                                | 2.19                                                                 | 0.620             | 102                                                   |
| 17                                                      | 4.0                                                 | 7.66                                                                | 3.37                                                                 | 0.825             | 88                                                    |
| 34                                                      | 7.0                                                 | 8.48                                                                | 5.43                                                                 | 0.988             | 75                                                    |
| 53                                                      | 8.0                                                 | 9.27                                                                | 7.44                                                                 | 1.13              | 86                                                    |
| 71                                                      | 10.0                                                | 9.87                                                                | 9.67                                                                 | 1.19              | 89                                                    |
| 90                                                      | 11.0                                                | 10.5                                                                | 11.54                                                                | 1.20              | 75                                                    |

a. Concentration is 1 × 10<sup>-4</sup> mol dm<sup>-3</sup>.

b. Measured at 255 nm.

c. Change in absorbance accompanying reaction.

d. Calculated as ΔAbs/(ΔAbs<sub>∞</sub> - ΔAbs)·[**1a**] with ΔAbs<sub>∞</sub> 1.38. Values for derived kinetic parameters are in Table 6.

Table S3

Kinetic and equilibrium data for reaction of **1a** with 3-nitroaniline<sup>a</sup> in water at 25°C and pH 8.0.

| [ <b>1a</b> ]/<br>10 <sup>-3</sup> mol dm <sup>-3</sup> | [sulfite]/<br>10 <sup>-3</sup> mol dm <sup>-3</sup> | k <sub>obs</sub> <sup>b</sup> /<br>10 <sup>-4</sup> s <sup>-1</sup> | k <sub>obs</sub> [sulfite]/<br>10 <sup>-6</sup> s <sup>-1</sup> | ΔAbs  | K/<br>dm <sup>3</sup> mol <sup>-1</sup> |
|---------------------------------------------------------|-----------------------------------------------------|---------------------------------------------------------------------|-----------------------------------------------------------------|-------|-----------------------------------------|
| 8.0                                                     | 3.0                                                 | 0.88                                                                | 0.26                                                            | 0.394 | 129                                     |
| 17.0                                                    | 4.0                                                 | 0.97                                                                | 0.43                                                            | 0.521 | 121                                     |
| 34                                                      | 7.0                                                 | 12.0                                                                | 0.84                                                            | 0.632 | 130                                     |
| 53                                                      | 8.0                                                 | 13.2                                                                | 1.06                                                            | 0.674 | 126                                     |
| 71                                                      | 10.0                                                | 14.4                                                                | 1.41                                                            | 0.693 | 119                                     |
| 90                                                      | 11.0                                                | 15.3                                                                | 1.68                                                            | 0.714 | 130                                     |

a. Concentration is 1 × 10<sup>-4</sup> mol dm<sup>-3</sup>.

b. Measured at 260 nm.

c. Change in Absorbance accompanying reaction.

d. Calculated as ΔAbs/(ΔAbs<sub>∞</sub> - ΔAbs)·[**1a**] with ΔAbs<sub>∞</sub> 0.78. A linear plot of k<sub>obs</sub>[sulfite] versus [**1a**] gives k<sub>f</sub>[sulfite] 1.8 × 10<sup>-5</sup> s<sup>-1</sup> and k<sub>r</sub>[sulfite] 1.35 × 10<sup>-7</sup> mol dm<sup>-3</sup> s<sup>-1</sup>, leading to K (= k<sub>f</sub>/k<sub>r</sub>) 133 dm<sup>3</sup> mol<sup>-1</sup>.

Table S4

Kinetic and equilibrium data for reaction of **1a** with 3-cyanoaniline<sup>a</sup> in water at 25°C and pH

8.0

| [ <b>1a</b> ]/<br>10 <sup>-3</sup> mol dm <sup>-3</sup> | [sulfite]/<br>10 <sup>-3</sup> mol dm <sup>-3</sup> | k <sub>obs</sub> <sup>b</sup> /<br>10 <sup>-4</sup> s <sup>-1</sup> | k <sub>obs</sub> [sulfite]/<br>10 <sup>-6</sup> mol dm <sup>-3</sup> s <sup>-1</sup> | ΔAbs <sup>c</sup> | K/<br>dm <sup>3</sup> mol <sup>-1</sup> |
|---------------------------------------------------------|-----------------------------------------------------|---------------------------------------------------------------------|--------------------------------------------------------------------------------------|-------------------|-----------------------------------------|
| 8.0                                                     | 3.0                                                 | 1.40                                                                | 0.42                                                                                 | 0.535             | 136                                     |
| 17                                                      | 4.0                                                 | 1.36                                                                | 0.55                                                                                 | 0.691             | 121                                     |
| 34                                                      | 7.0                                                 | 1.41                                                                | 0.99                                                                                 | 0.838             | 132                                     |
| 53                                                      | 10.0                                                | 1.46                                                                | 1.46                                                                                 | 0.893             | 128                                     |
| 71                                                      | 12.0                                                | 1.51                                                                | 1.81                                                                                 | 0.917             | 120                                     |
| 90                                                      | 14.0                                                | 1.56                                                                | 2.18                                                                                 | 0.932             | 111                                     |

a. Concentration is 1 × 10<sup>-4</sup> mol dm<sup>-3</sup>.

b. Measured at 257 nm.

c. Change in absorbance accompanying reaction.

d. Calculated as ΔAbs/(ΔAbs<sub>∞</sub> - ΔAbs)·[**1a**] with ΔAbs<sub>∞</sub> = 1.025. A linear plot of k<sub>obs</sub>[sulfite] versus [**1a**] gives k<sub>f</sub>[sulfite] 2.4 × 10<sup>-5</sup> s<sup>-1</sup> and k<sub>r</sub>[sulfite] 2.1 × 10<sup>-7</sup> mol dm<sup>-3</sup> s<sup>-1</sup> leading to K (= k<sub>f</sub>/k<sub>r</sub>) 114 dm<sup>3</sup> mol<sup>-1</sup>.

Table S5

Kinetic data for reaction of **1b** with aniline<sup>a</sup> in water at 25°C and pH = 7.57.

| [ <b>1b</b> ]/<br>10 <sup>-2</sup> mol dm <sup>-3</sup> | [sulfite]<br>10 <sup>-3</sup> mol dm <sup>-3</sup> | k <sub>obs</sub> <sup>b/</sup><br>10 <sup>-3</sup> s <sup>-1</sup> | k <sub>obs</sub> [sulfite] <sup>c/</sup><br>10 <sup>-5</sup> mol dm <sup>-3</sup> s <sup>-1</sup> |
|---------------------------------------------------------|----------------------------------------------------|--------------------------------------------------------------------|---------------------------------------------------------------------------------------------------|
| 1.50                                                    | 6.3                                                | 1.27                                                               | 0.80                                                                                              |
| 2.30                                                    | 6.3                                                | 1.62                                                               | 1.02                                                                                              |
| 3.28                                                    | 6.3                                                | 1.98                                                               | 1.25                                                                                              |
| 4.93                                                    | 6.3                                                | 2.62                                                               | 1.65                                                                                              |
| 6.24                                                    | 6.3                                                | 3.24                                                               | 2.04                                                                                              |

a. Concentration is 1 × 10<sup>-4</sup> mol dm<sup>-3</sup>.

b. Measured at 250 nm.

c. A linear plot of k<sub>obs</sub>[sulfite] versus [**1b**] gives k<sub>f</sub>[sulfite] 2.5 × 10<sup>-4</sup> s<sup>-1</sup> and k<sub>r</sub>[sulfite]

4.2 × 10<sup>-6</sup> mol dm<sup>-3</sup> s<sup>-1</sup> leading to K (= k<sub>f</sub>/k<sub>r</sub>) 60 dm<sup>3</sup> mol<sup>-1</sup>.

Table S6

Variation with pH of values of rate and equilibrium constants for reaction of **1a** with 4-methylaniline.

| pH   | $k_f[\text{sulfite}]/$<br>$10^{-4} \text{ s}^{-1}$ | $k_r[\text{sulfite}]/$<br>$10^{-6} \text{ mol dm}^{-3} \text{ s}^{-1}$ | $K^a(\text{kinetic})/$<br>$\text{dm}^3 \text{ mol}^{-1}$ | $K^b(\text{Abs})/$<br>$\text{dm}^3 \text{ mol}^{-1}$ |
|------|----------------------------------------------------|------------------------------------------------------------------------|----------------------------------------------------------|------------------------------------------------------|
| 5.8  | 9.0                                                | 22                                                                     | 41                                                       | 58                                                   |
| 8.0  | 3.7                                                | 6.4                                                                    | 58                                                       | 60                                                   |
| 9.2  | 1.9                                                | 2.8                                                                    | 68                                                       | 65                                                   |
| 10.0 | 1.4                                                | 2.8                                                                    | 51                                                       | 51                                                   |

a.  $K = k_f[\text{sulfite}]/k_r[\text{sulfite}]$ .

b. Calculated from absorbance changes accompanying reaction.

Table S7

Variation with pH of values of rate and equilibrium constants for reaction of **1a** with 3-chloroaniline.

| pH   | $k_f[\text{sulfite}]/$<br>$10^{-4} \text{ s}^{-1}$ | $k_r[\text{sulfite}]/$<br>$10^{-6} \text{ mol dm}^3 \text{ s}^{-1}$ | $K^a(\text{kinetic})/$<br>$\text{dm}^3 \text{ mol}^{-1}$ | $K^b(\text{Abs})/$<br>$\text{dm}^3 \text{ mol}^{-1}$ |
|------|----------------------------------------------------|---------------------------------------------------------------------|----------------------------------------------------------|------------------------------------------------------|
| 4.7  | 3.5                                                | 3.9                                                                 | 88                                                       | 95                                                   |
| 5.8  | 2.3                                                | 2.4                                                                 | 97                                                       | 90                                                   |
| 8.0  | 0.79                                               | 0.84                                                                | 94                                                       | 94                                                   |
| 9.2  | 0.26                                               | 0.18                                                                | 92                                                       | 95                                                   |
| 10.0 | 0.19                                               | 0.20                                                                | 97                                                       | 84                                                   |

a.  $K = k_f[\text{sulfite}]/k_r[\text{sulfite}]$ .

b. Calculated from absorbance changes accompanying reaction.

Table S8

Variation with pH of values of rate and equilibrium constants for reaction of **1a** with 3-nitroaniline

| pH  | $k_f[\text{sulfite}]/$<br>$10^{-5} \text{ s}^{-1}$ | $k_r[\text{sulfite}]/$<br>$10^{-7} \text{ mol dm}^{-3} \text{ s}^{-1}$ | $K^a(\text{kinetic})/$<br>$\text{dm}^3 \text{ mol}^{-1}$ | $K^b(\text{Abs})/$<br>$\text{dm}^3 \text{ mol}^{-1}$ |
|-----|----------------------------------------------------|------------------------------------------------------------------------|----------------------------------------------------------|------------------------------------------------------|
| 4.7 | 9.3                                                | 7.4                                                                    | 126                                                      | 137                                                  |
| 5.8 | 5.7                                                | 4.8                                                                    | 120                                                      | 138                                                  |
| 6.0 | 6.9                                                | 5.6                                                                    | 123                                                      | 125                                                  |
| 8.0 | 1.8                                                | 1.35                                                                   | 133                                                      | 128                                                  |
| 9.2 | 0.60                                               | 0.45                                                                   | 134                                                      | 121                                                  |

a.  $K = k_f[\text{sulfite}]/k_r[\text{sulfite}]$ .

b. Calculated from absorbance changes accompanying reaction.



Table S9

Variation with pH of values of rate and equilibrium constants for reaction of **1a** with 3-cyanoaniline.

| pH  | $k_f[\text{sulfite}]/$<br>$10^{-5} \text{ s}^{-1}$ | $k_r[\text{sulfite}]/$<br>$10^{-7} \text{ mol dm}^3 \text{ s}^{-1}$ | $K^a(\text{kinetic})/$<br>$\text{dm}^3 \text{ mol}^{-1}$ | $K^b(\text{Abs})/$<br>$\text{dm}^3 \text{ mol}^{-1}$ |
|-----|----------------------------------------------------|---------------------------------------------------------------------|----------------------------------------------------------|------------------------------------------------------|
| 4.7 | 12.6                                               | 9.6                                                                 | 130                                                      | 120                                                  |
| 5.8 | 9.9                                                | 7.7                                                                 | 129                                                      | 123                                                  |
| 8.0 | 2.4                                                | 2.1                                                                 | 115                                                      | 125                                                  |
| 9.2 | 0.70                                               | 0.52                                                                | 132                                                      | 122                                                  |

a.  $K = k_f[\text{sulfite}]/k_r[\text{sulfite}]$ .

b. Calculated from absorbance changes accompanying reaction.

Table S10

Variation with pH of values of rate and equilibrium constants for reaction of **1b** with aniline.

| pH  | $k_f[\text{sulfite}]/$<br>$10^{-4} \text{ s}^{-1}$ | $k_r[\text{sulfite}]/$<br>$10^{-6} \text{ mol dm}^3 \text{ s}^{-1}$ | $K^a(\text{kinetic})/$<br>$\text{dm}^3 \text{ mol}^{-1}$ |
|-----|----------------------------------------------------|---------------------------------------------------------------------|----------------------------------------------------------|
| 5.4 | 7.9                                                | 13                                                                  | 60                                                       |
| 6.6 | 3.6                                                | 6.0                                                                 | 60                                                       |
| 7.6 | 2.5                                                | 4.2                                                                 | 60                                                       |
| 8.4 | 1.4                                                | 2.4                                                                 | 58                                                       |

a.  $K = k_f[\text{sulfite}]/k_r[\text{sulfite}]$ .

Table S11

Variation with pH of values of rate and equilibrium constants for reaction of **1a** with 4-chloroaniline

| pH   | $k_f[\text{sulfite}]/$<br>$10^{-4} \text{ s}^{-1}$ | $k_r[\text{sulfite}]/$<br>$10^{-6} \text{ mol dm}^{-3} \text{ s}^{-1}$ | $K^a[\text{kinetic}]/$<br>$\text{dm}^3 \text{ mol}^{-1}$ | $K^b(\text{Abs})/$<br>$\text{dm}^3 \text{ mol}^{-1}$ |
|------|----------------------------------------------------|------------------------------------------------------------------------|----------------------------------------------------------|------------------------------------------------------|
| 4.7  | 5.15                                               | 8.63                                                                   | 60                                                       | 86                                                   |
| 5.8  | 4.36                                               | 5.48                                                                   | 80                                                       | 89                                                   |
| 6.0  | 5.11                                               | 8.1                                                                    | 63                                                       | 76                                                   |
| 7.0  | 1.94                                               | 2.82                                                                   | 69                                                       | 81                                                   |
| 8.0  | 1.21                                               | 1.49                                                                   | 81                                                       | 82                                                   |
| 9.2  | 0.46                                               | 0.42                                                                   | 110                                                      | 90                                                   |
| 10.0 | 0.37                                               | 0.45                                                                   | 81                                                       | 67                                                   |

a.  $K = k_f[\text{sulfite}]/k_r[\text{sulfite}]$ .

b. Calculated from changes in absorbance accompanying reaction, as in Tables 3 and 4.
